# Supplementary material for: Au-Decorated WS2 Microflakes Based Sensors for Selective Ammonia Detection at Room Temperature
Source: MDPI journal article supplement (doi:10.3390/chemosensors10010009), 2021-12-27
Supplement: s1 [file s1]

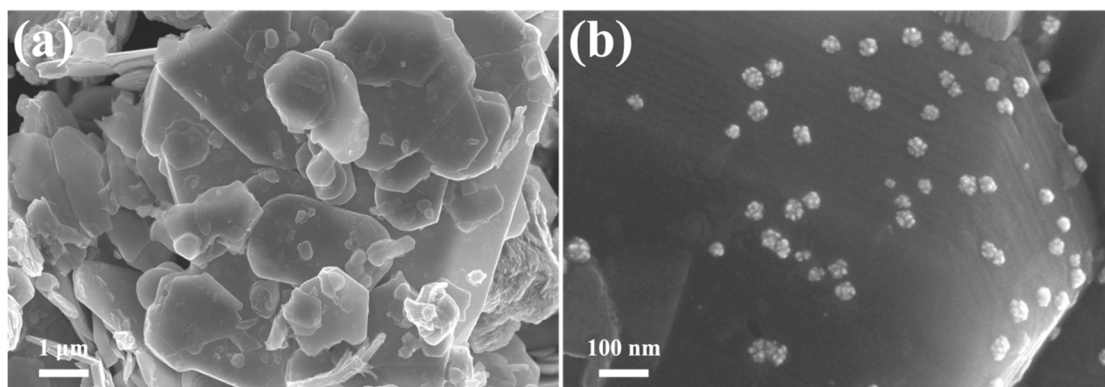

Figure S1. (a) Lower magnification SEM image of WS<sub>2</sub> microflakes, (b) lower magnification SEM image of Au/WS<sub>2</sub>-5.6 nanocomposites.

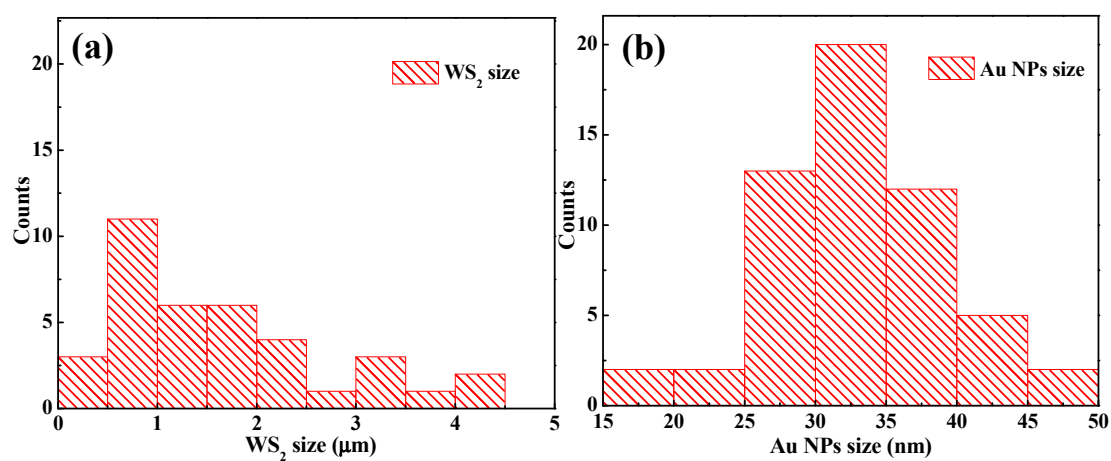

Figure S2. (a) Statistical size distribution of WS<sub>2</sub> microflakes, (b) statistical size distribution of Au-NPs.

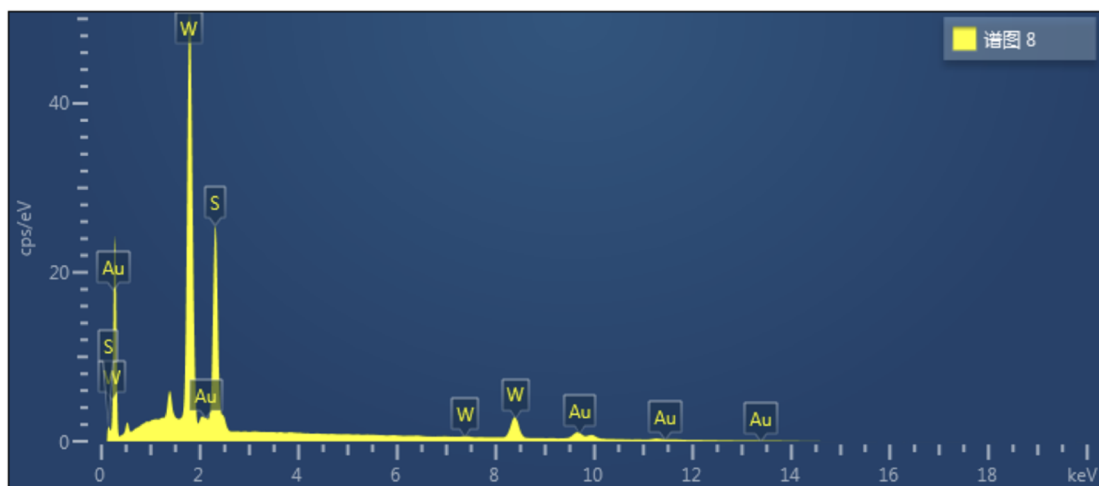

| Elements | Type of line | Weight percentage | Wt% Sigma | Atomic percentage |
|----------|--------------|-------------------|-----------|-------------------|
| S        | K            | 25.24             | 0.24      | 65.98             |
| W        | M            | 72.64             | 0.39      | 33.12             |
| Au       | M            | 2.13              | 0.43      | 0.9               |

Figure S3. EDS patterns of Au/WS<sub>2</sub>-5.6

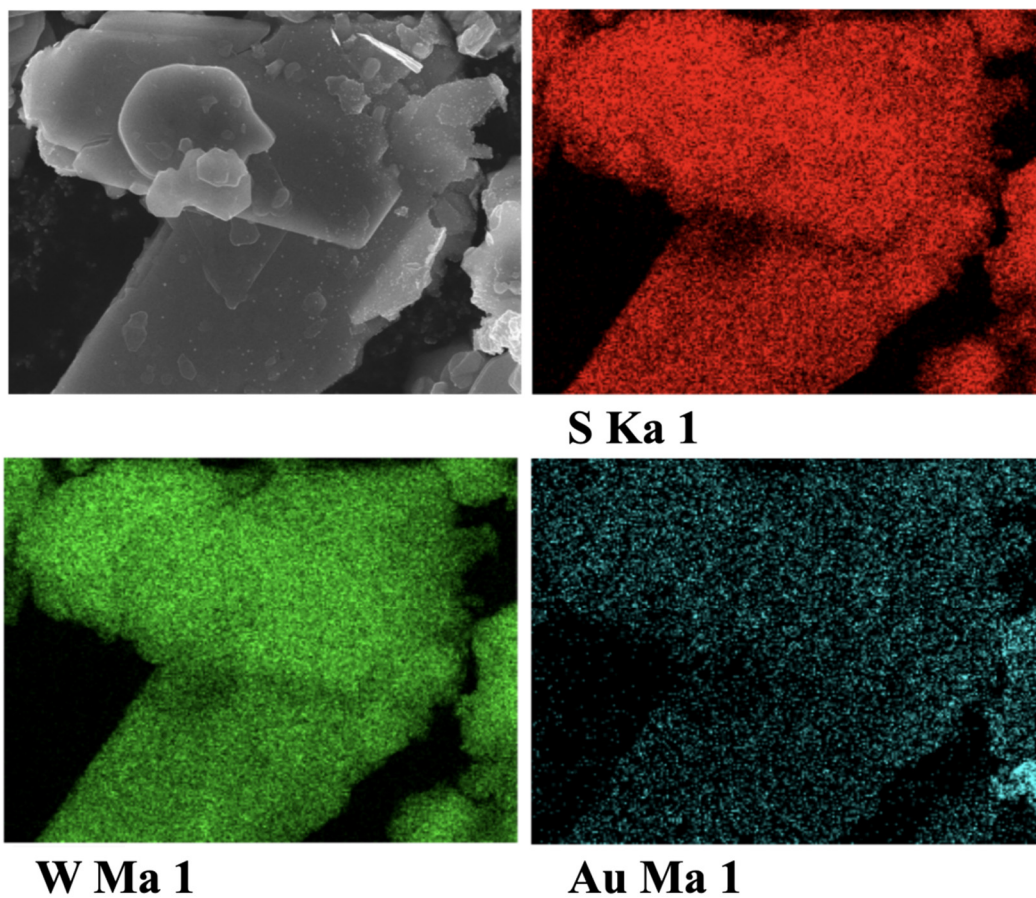

Figure S4. Elemental mapping images of Au/WS<sub>2</sub>-5.6

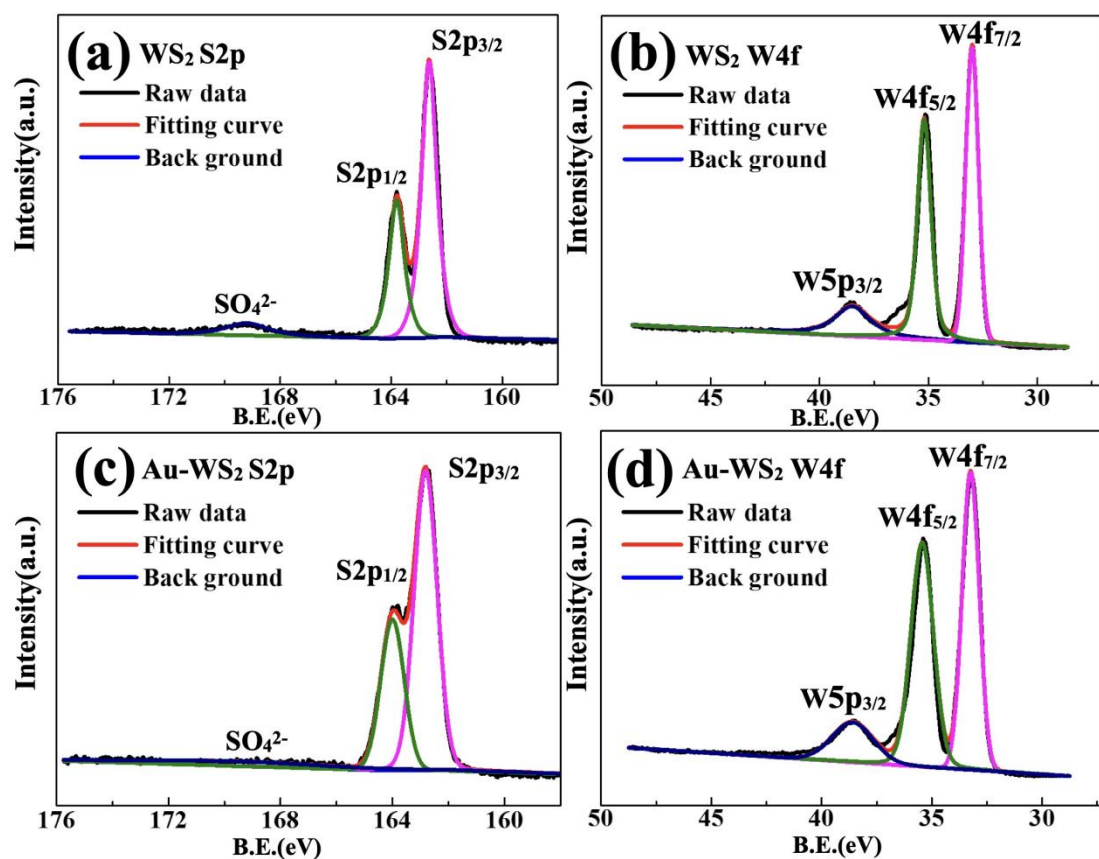

Figure S5. (a) S 2p of WS<sub>2</sub> microflakes, (b) W 4f of WS<sub>2</sub> microflakes, (c) S 2p of Au/WS<sub>2</sub>-5.6 nanocomposites, (d) W 4f of Au/WS<sub>2</sub>-5.6 nanocomposites.

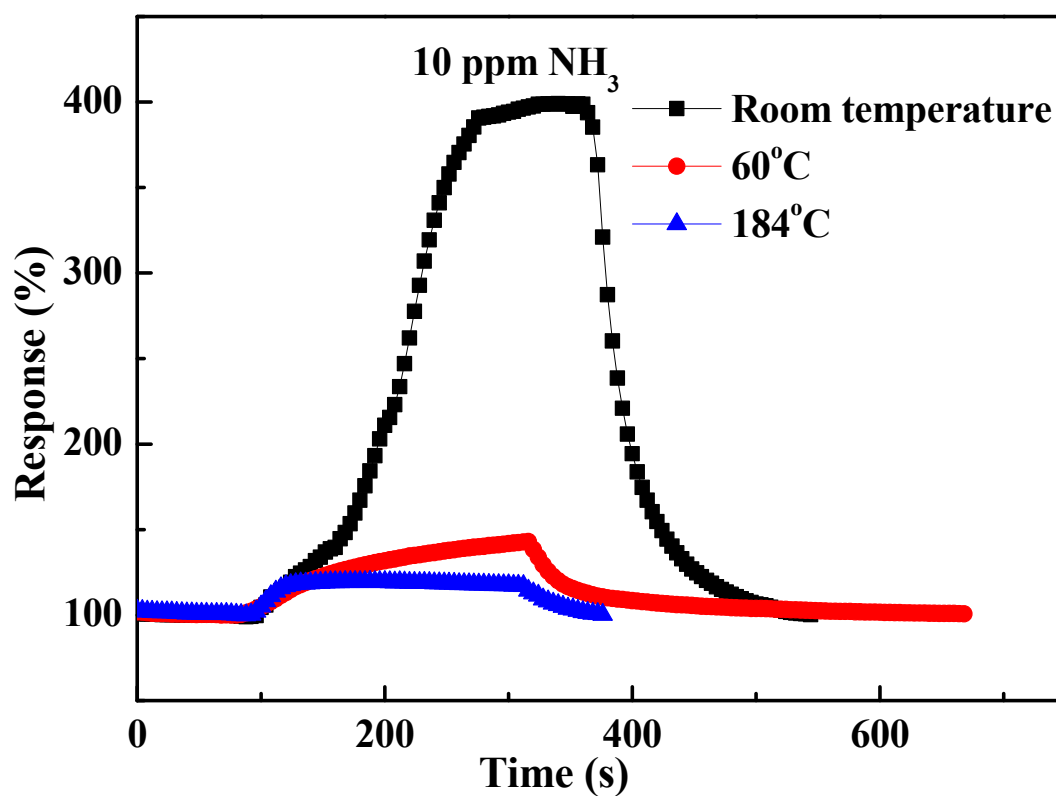

Figure S6. The Au/WS<sub>2</sub>-5.6 based gas sensor response beyond room temperature.
